# Supplementary material
Source: Springer Nature journal article supplement (https://www.springermedizin.de/resource/supplementary/12872_2005_90_MOESM1_ESM.pdf/9430998)
Supplement: MOESM1 [file 9430998]

# Random sample of 45-80 year old inhabitants of Halle

Known telephone-no.

Unknown telephone-no.

1<sup>st</sup> written invitation

If no active response

Phone contact  
10x at different times and days

If not successful within 6 weeks

2<sup>nd</sup> written invitation

If no response or contact

Home visit

1<sup>st</sup> written invitation

If no active response

2<sup>nd</sup> written invitation

If no active response

Home visit

Participation by subject  
Target: 1750 subjects

Subject refused  
to participate

No response  
from subject

Subject excluded  
by investigator
